# Supplementary material
Source: PubMed Central journal article supplement (PMC3475188)

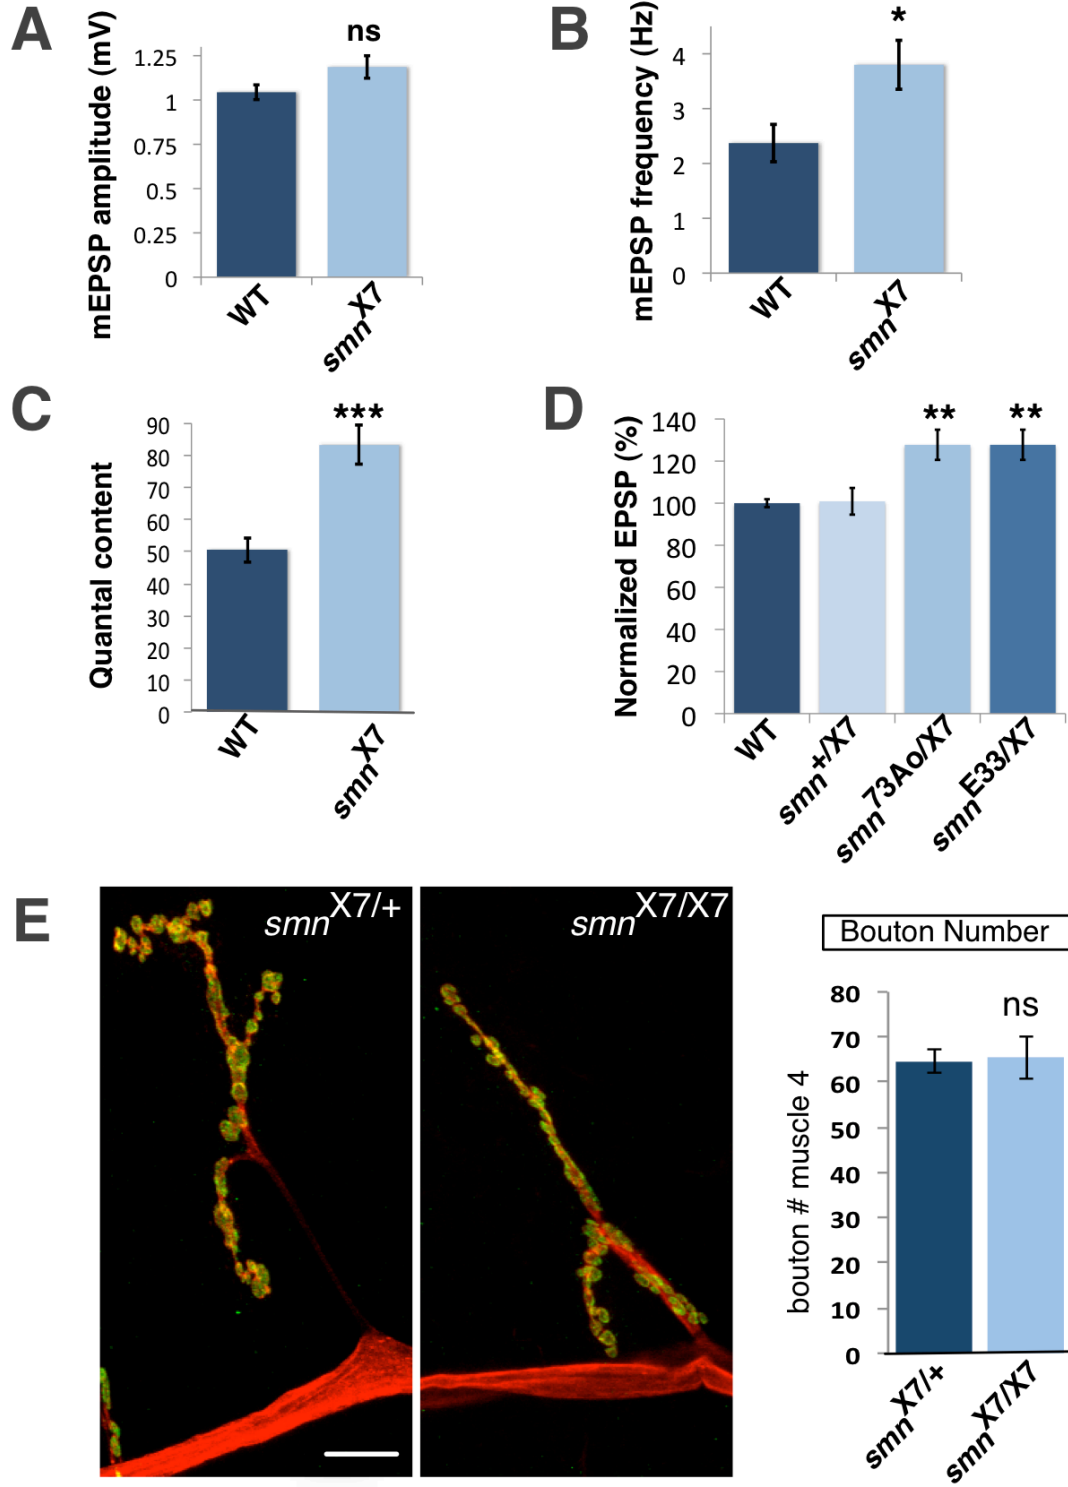

Supplement: NIHMS407928-supplement-02.pdf [file NIHMS407928-supplement-02.pdf]
